# Supplementary material
Source: Research Square preprint supplement (doi:10.21203/rs.3.rs-9201479/v1)
Supplement: Supplementary file 1 [file a69bfb6348152e3f4e9f41bc.docx]

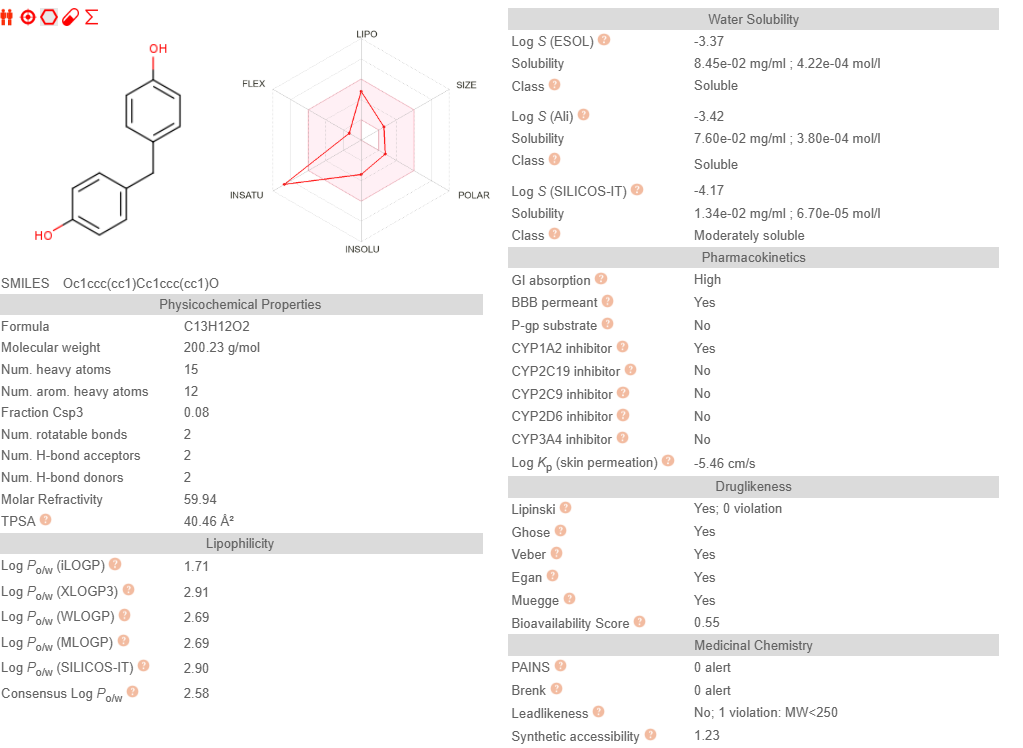


**Supplementary Fig**ure 1 BPF ADME Assessment****


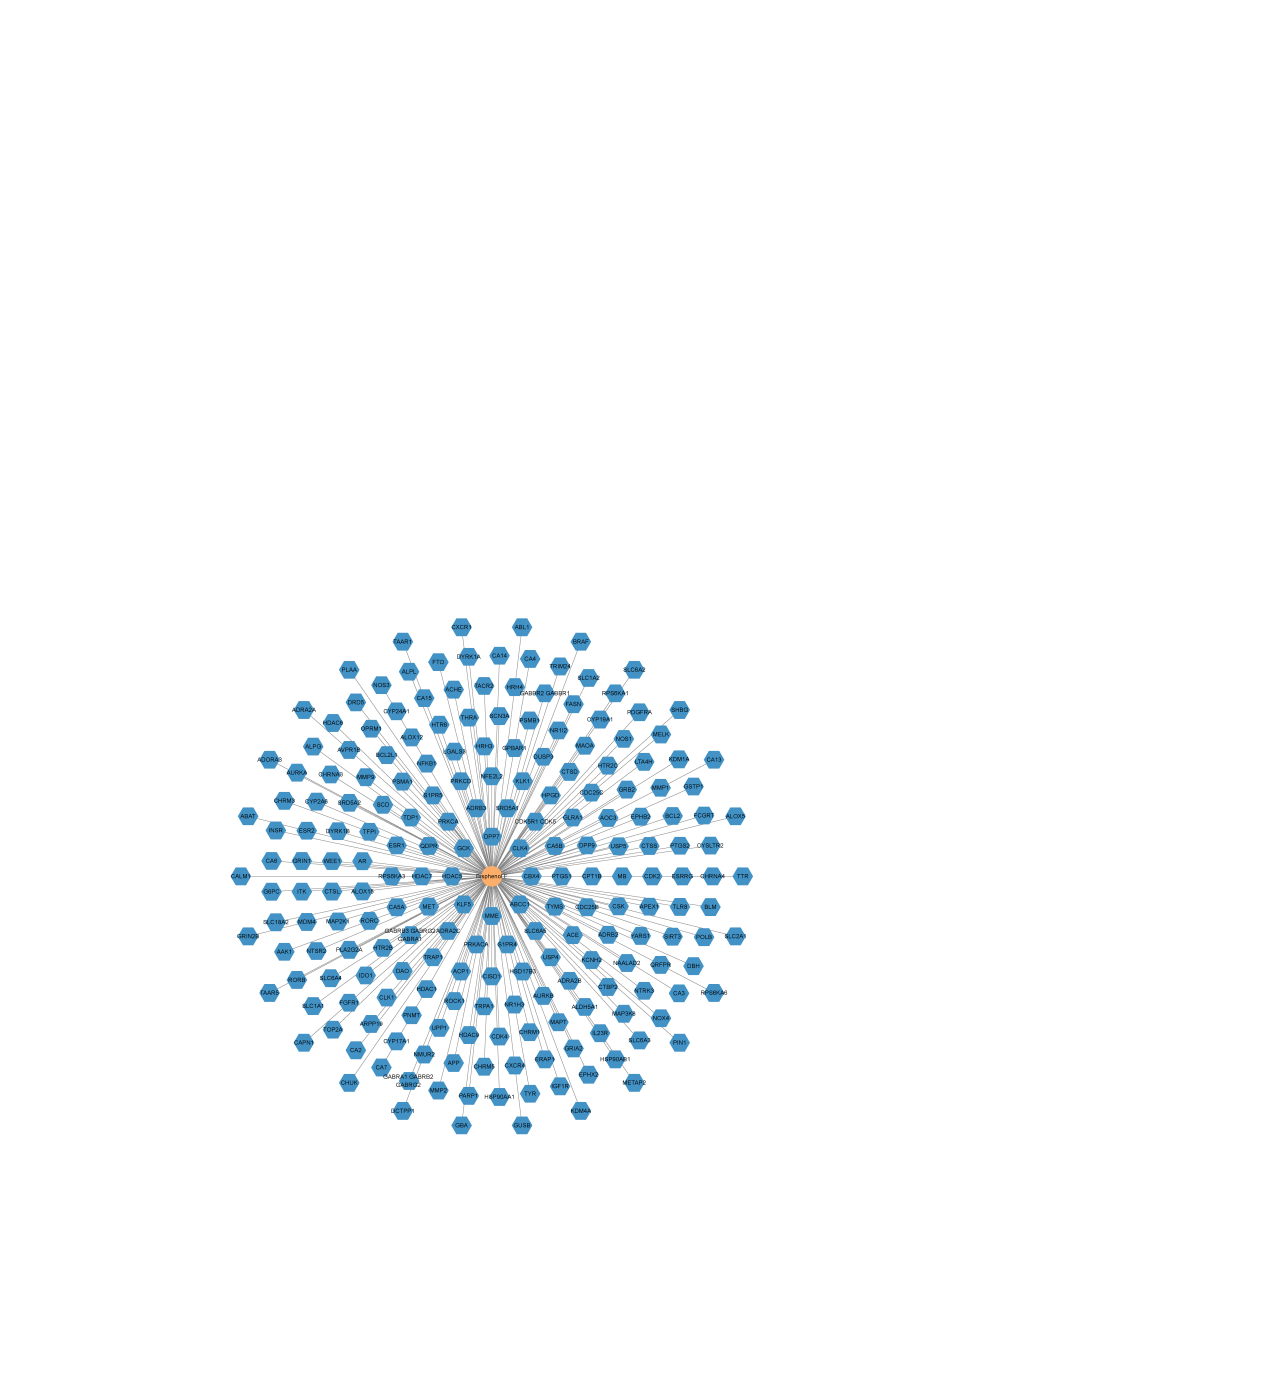


**Supplementary Fig**ure 2** BPF-Target Gene Network**

**Supplementary Table 1. Binding free energies between key genes and small molecule drugs.**

| metabolites | targets | Binding Energy (kcal/mol) |
| --- | --- | --- |
| BisphenolF | INSR | -6.7 |

**Supplementary Table 2. The predicted binding free energy and the individual energy components (kJ/mol).**

| Complex | Van der Waals Energy (ΔEvdw) | Electrostatic Energy (ΔEelec) | Polar Solvation Energy (ΔGpolar) | SASA Energy (ΔGnonpolar) | Binding Energy (ΔGbind) |
| --- | --- | --- | --- | --- | --- |
| INSR-BisphenolF | -117.718± 10.838 | -34.536± 9.139 | 102.986± 12.718 | -12.317± 0.635 | -61.585 ± 7.503 |
